# Supplementary material for: Label-free silver nanoparticles for visual colorimetric detection of etimicin
Source: Royal Society of Chemistry journal article supplement (doi:10.1039/c4ay01439a), 2014-01-01
Supplement: c4ay01439a1.pdf [file c4ay01439a1.pdf]

Analytical methods

Electronic Supplementary Information

**Label-free silver nanoparticles for visual colorimetric detection of  
etimicin**

Nan Li, Yu Gu, Mengmeng Gao, Zilu Wang, Deli Xiao, Yun Li, Jing Wang, Hua He

**Fig. S1**

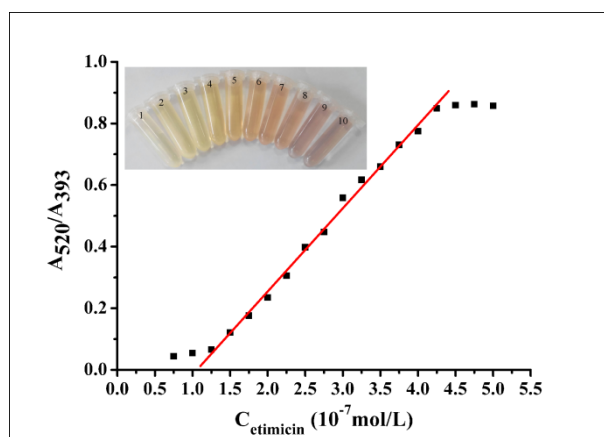

**Fig. S1** Plots of the absorption ratio ( $A_{520}/A_{393}$ ) versus etimicin concentration spiked in human urine ranging from  $0.75 \times 10^{-7}$  to  $5 \times 10^{-7}$  mol/L. Experimental condition: pH=5.72;  $V_{\text{AgNPs}}=0.4$  mL; reaction temperature, room temperature; incubation time, 30 min. The insert is the image of label-free AgNPs suspension containing various etimicin concentrations from  $0.75 \times 10^{-7}$  to  $5 \times 10^{-7}$  mol/L.
